# Supplementary material
Source: MDPI journal article supplement (https://www.mdpi.com/2073-4441/15/4/777)
Supplement: s1 [file s1]

## Supplementary material

### Effect of Sand Co-Presence on $\text{Cr}^{\text{VI}}$ Removal in $\text{Fe}^0\text{-H}_2\text{O}$ System

Marius Gheju, Ionel Balcu

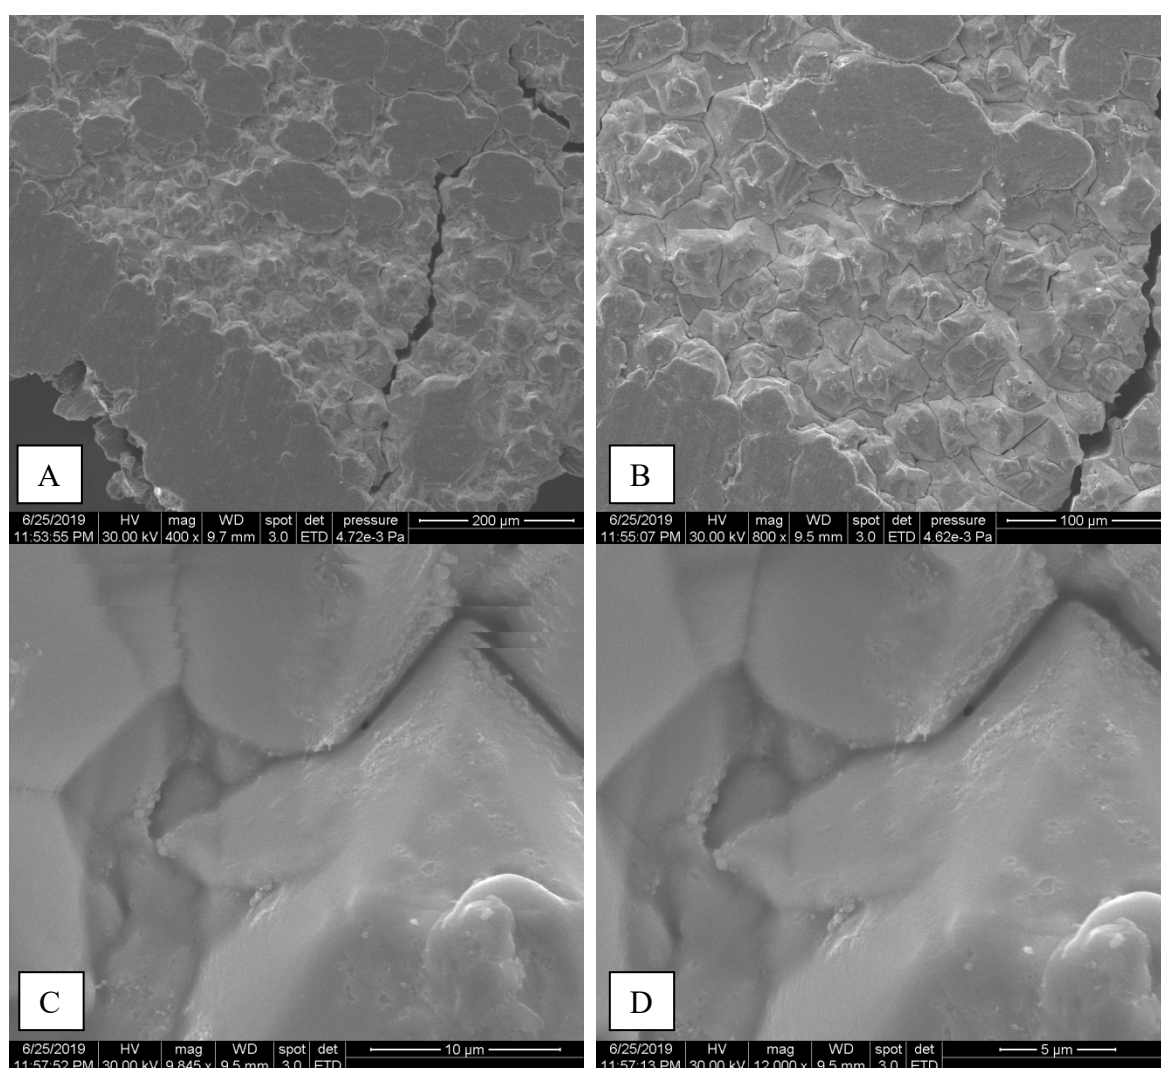

**Figure S1.** SEM micrograph of fresh  $\text{Fe}^0$  at different magnifications

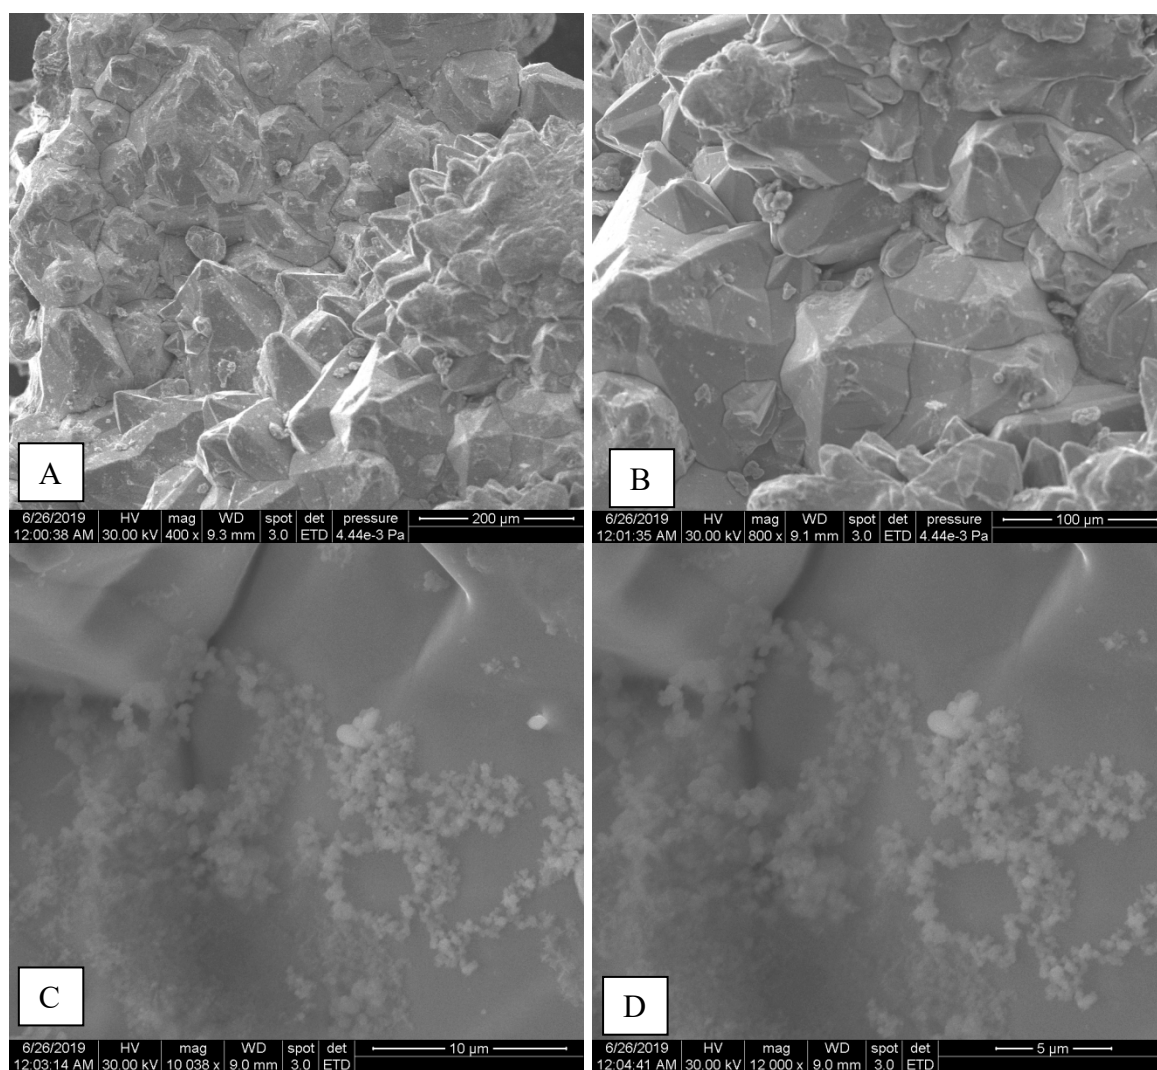

**Figure S2.** SEM micrograph of exhausted  $\text{Fe}^0$  from 100%  $\text{Fe}^0$  system at different magnifications

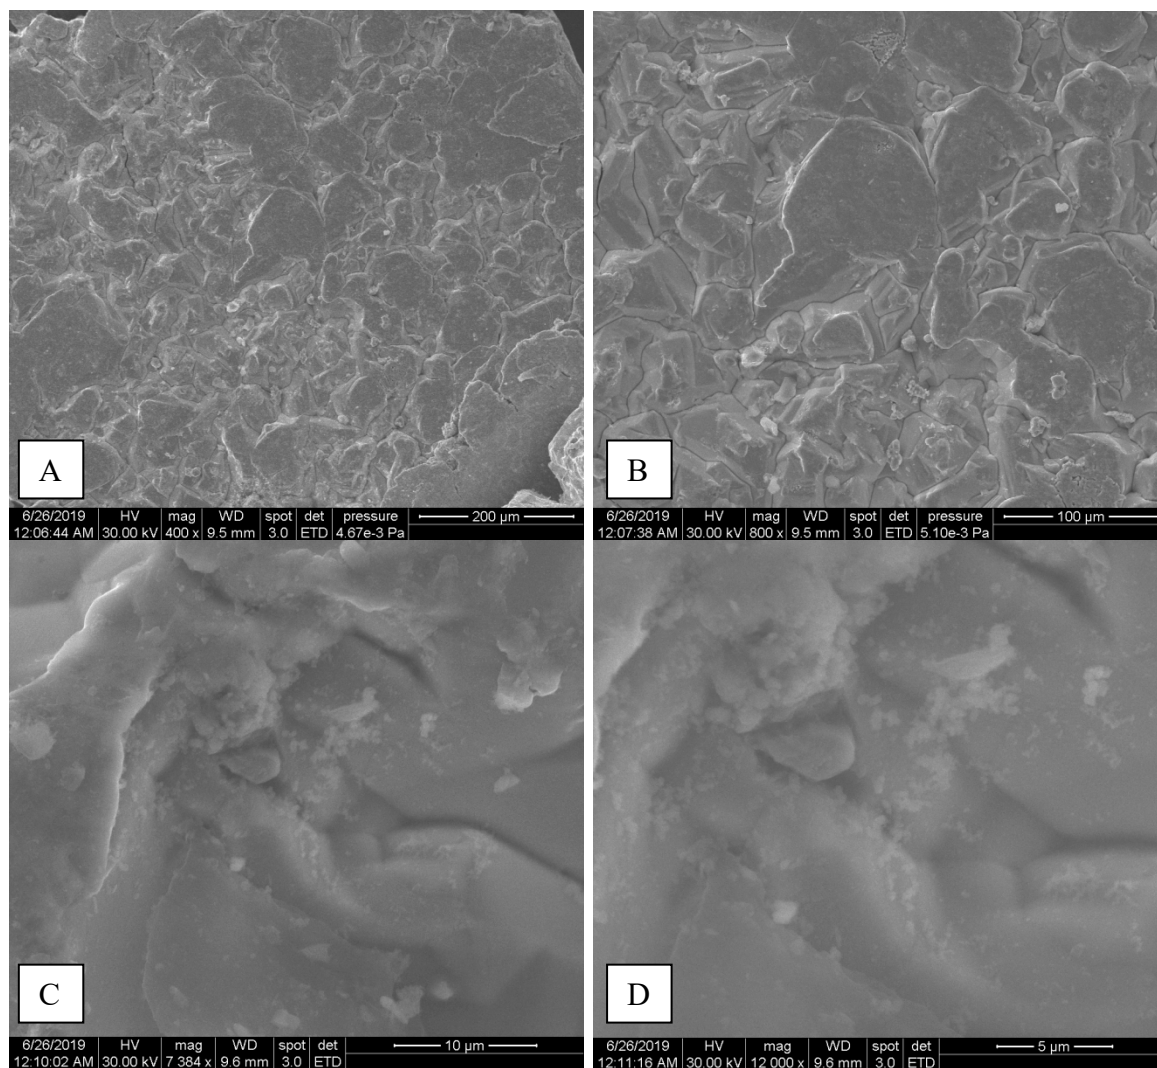

**Figure S3.** SEM micrograph of exhausted  $\text{Fe}^0$  from 50%  $\text{Fe}^0$  system at different magnifications

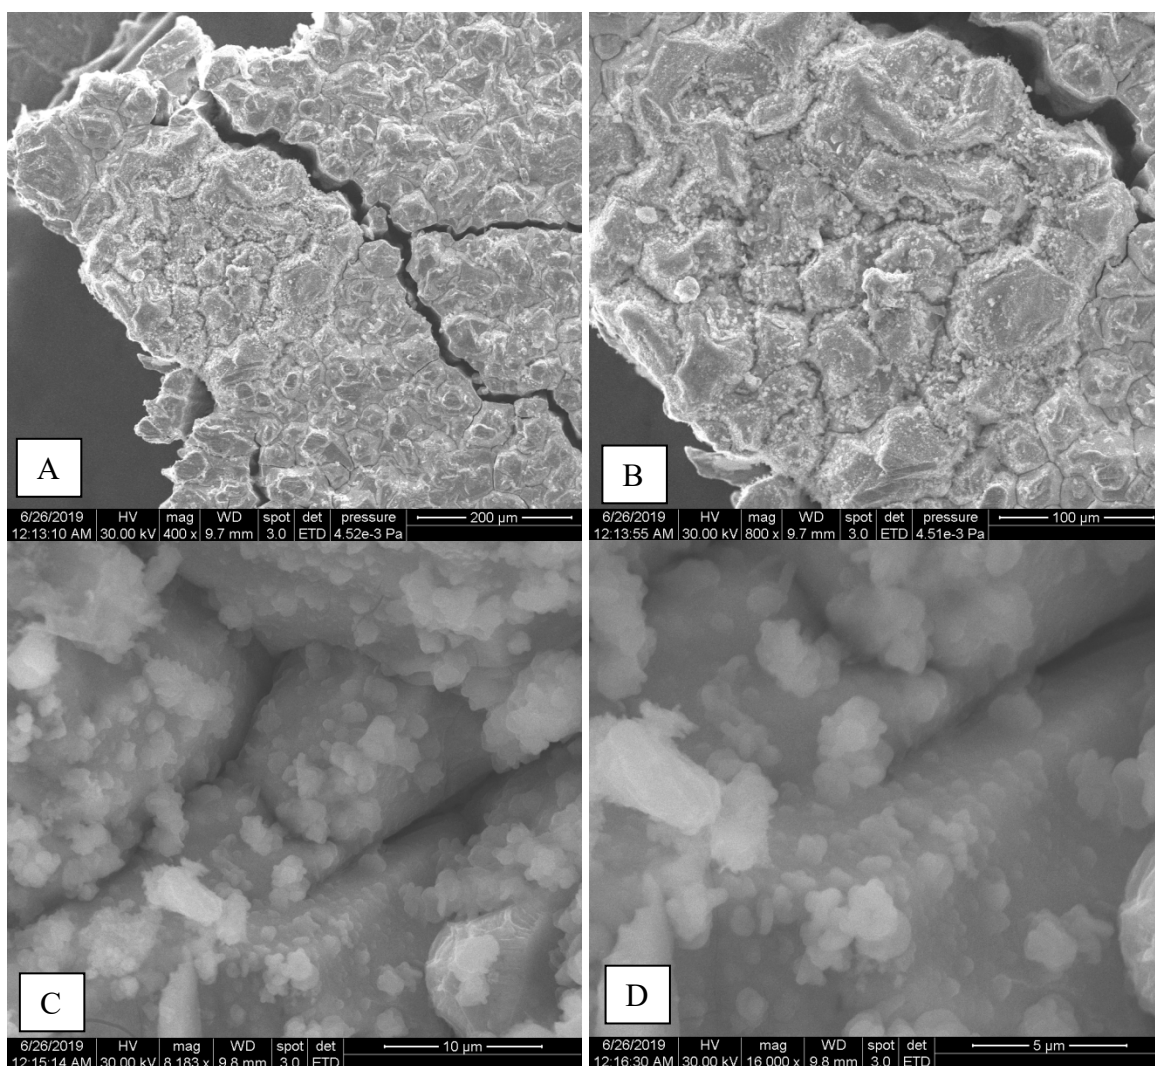

**Figure S4.** SEM micrograph of exhausted  $\text{Fe}^0$  from 20%  $\text{Fe}^0$  system at different magnifications

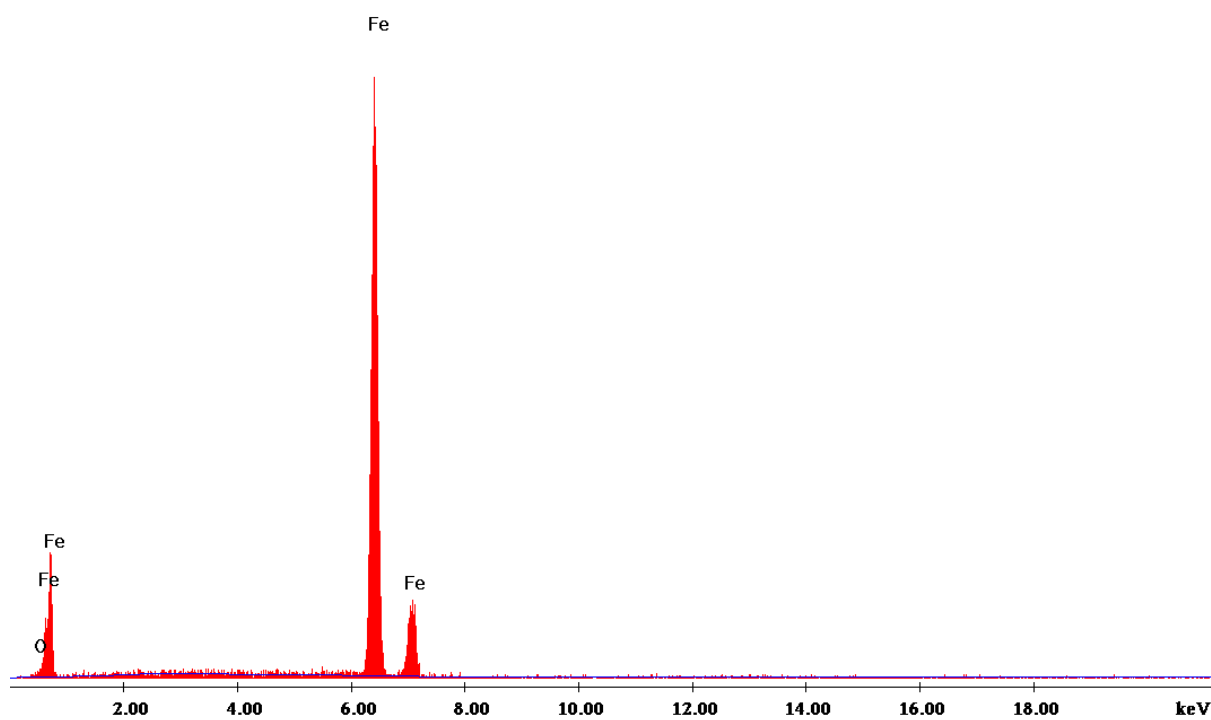

**Figure S5.** EDX pattern of fresh Fe<sup>0</sup>

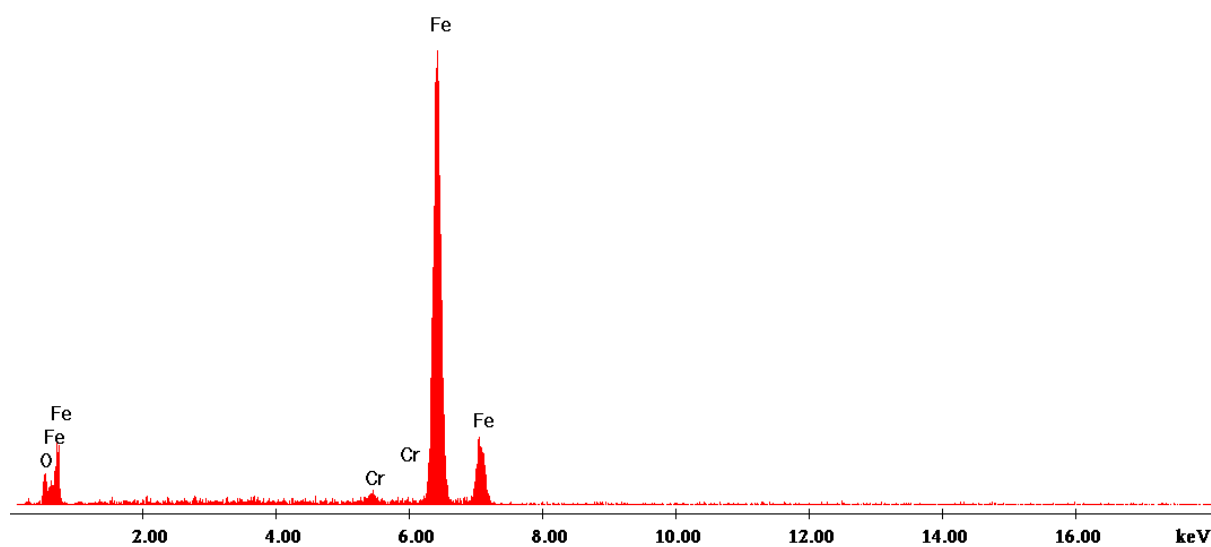

**Figure S6.** EDX pattern of exhausted Fe<sup>0</sup> from "Fe<sup>0</sup> only" system

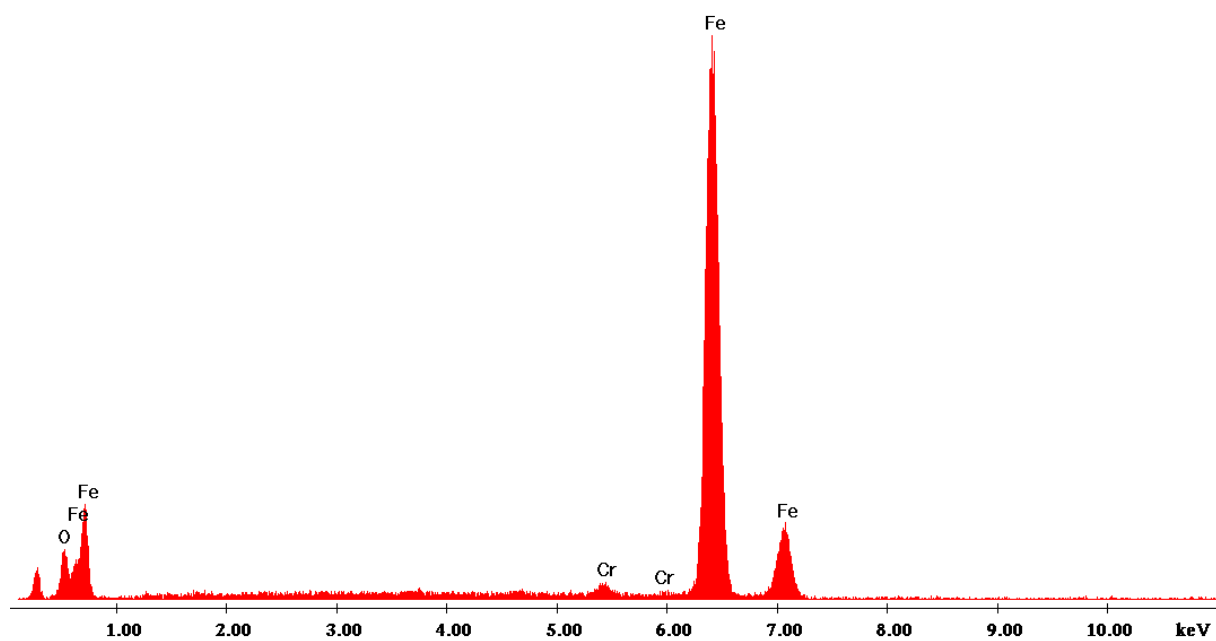

**Figure S7.** EDX pattern of exhausted  $\text{Fe}^0$  from "50%  $\text{Fe}^0$  + 50% sand" system

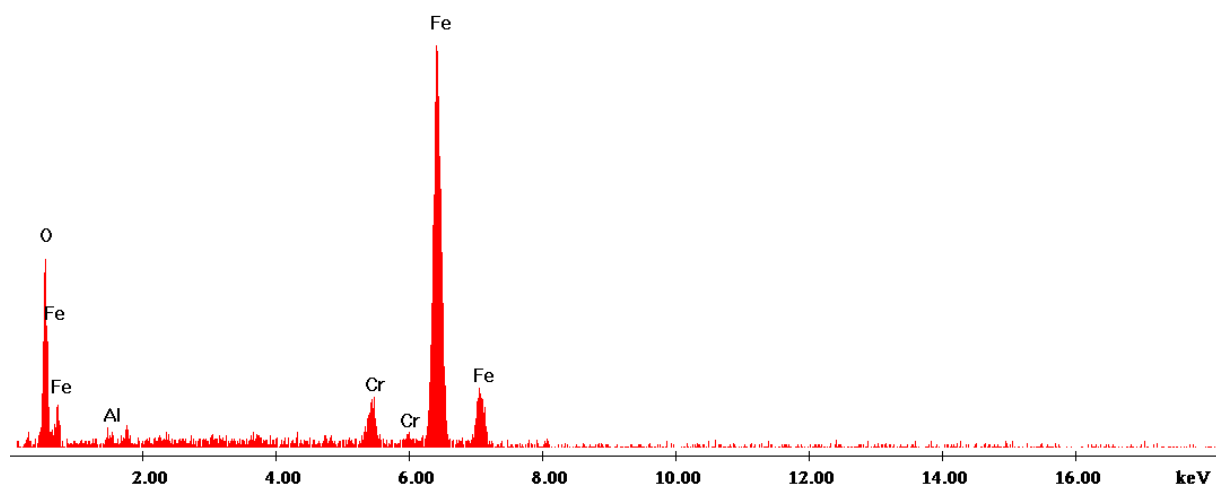

**Figure S8.** EDX pattern of exhausted  $\text{Fe}^0$  from "20%  $\text{Fe}^0$  + 80% sand" system

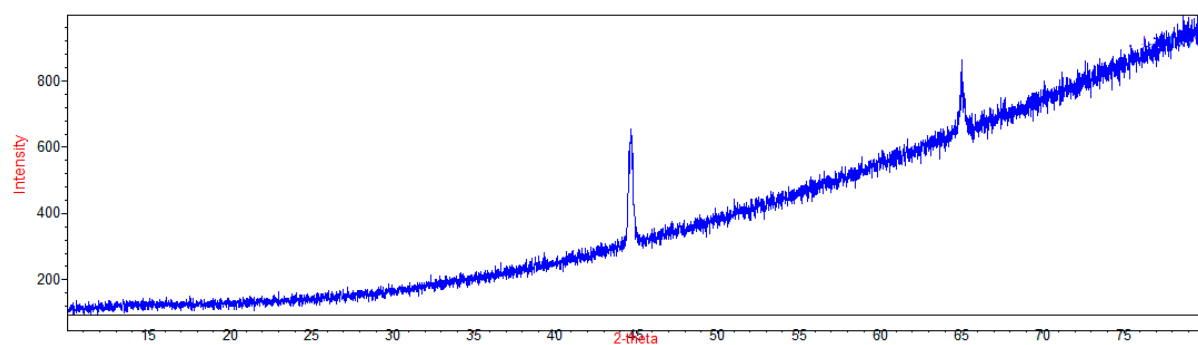

**Figure S9.** XRD pattern of fresh Fe<sup>0</sup>

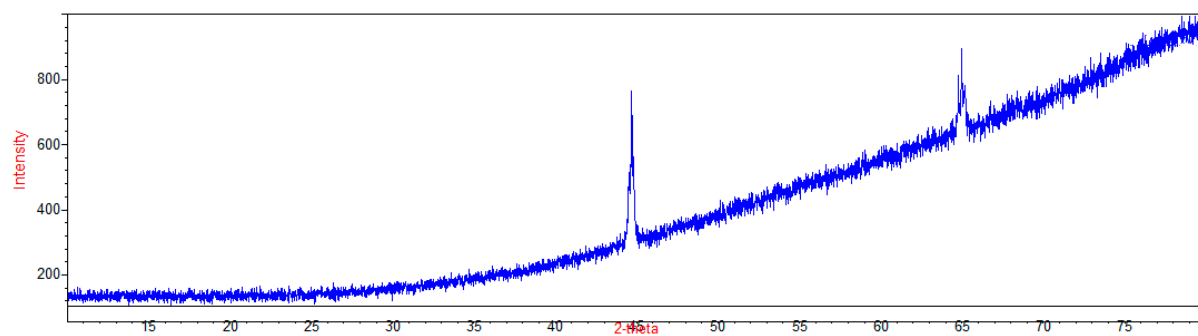

**Figure S10.** XRD pattern of exhausted Fe<sup>0</sup> from 100% Fe<sup>0</sup> system

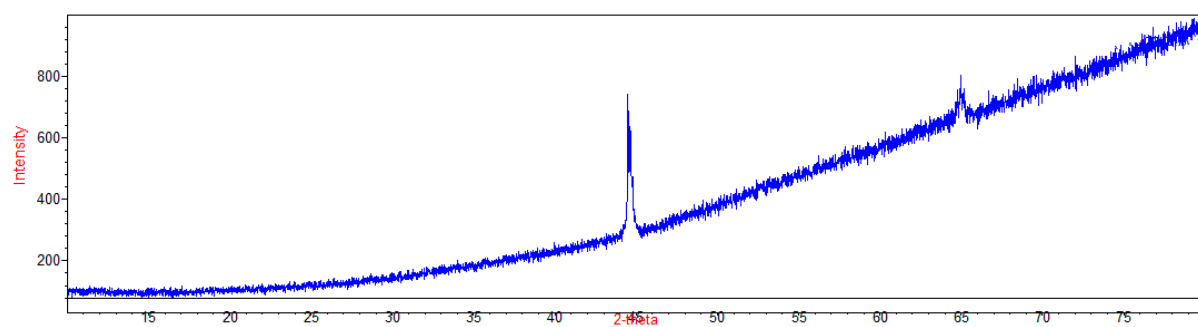

**Figure S11.** XRD pattern of exhausted Fe<sup>0</sup> from 50% Fe<sup>0</sup> system

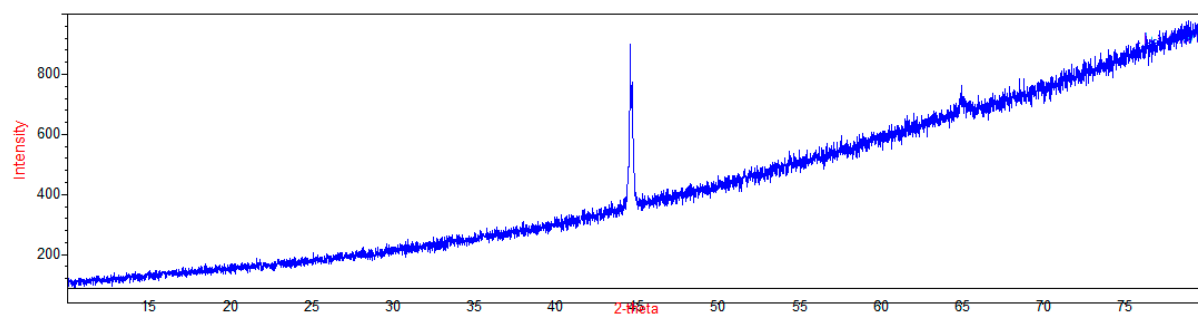

**Figure S12.** XRD pattern of exhausted Fe<sup>0</sup> from 20% Fe<sup>0</sup> system

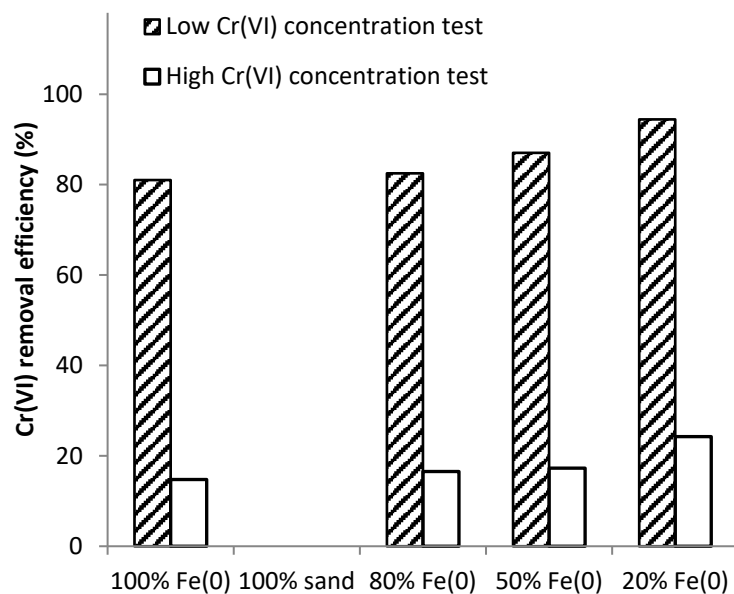

**Figure S13.** Profiles of  $\text{Cr}^{\text{VI}}$  removal efficiencies for non-disturbed batch experiments, after 40 experimental days.

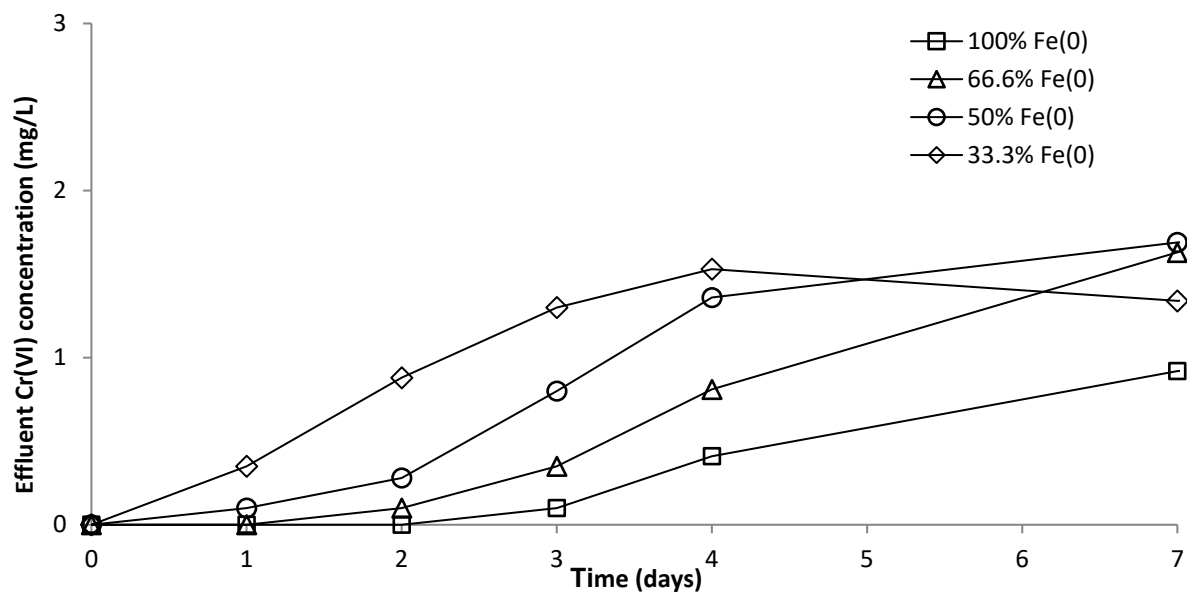

**Figure S14.** Evolution of  $\text{Cr}^{\text{VI}}$  breakthrough at pH 6.5, for columns having fixed  $\text{Fe}^0$  volume and variable total reactive zone volume  $V_2$ .



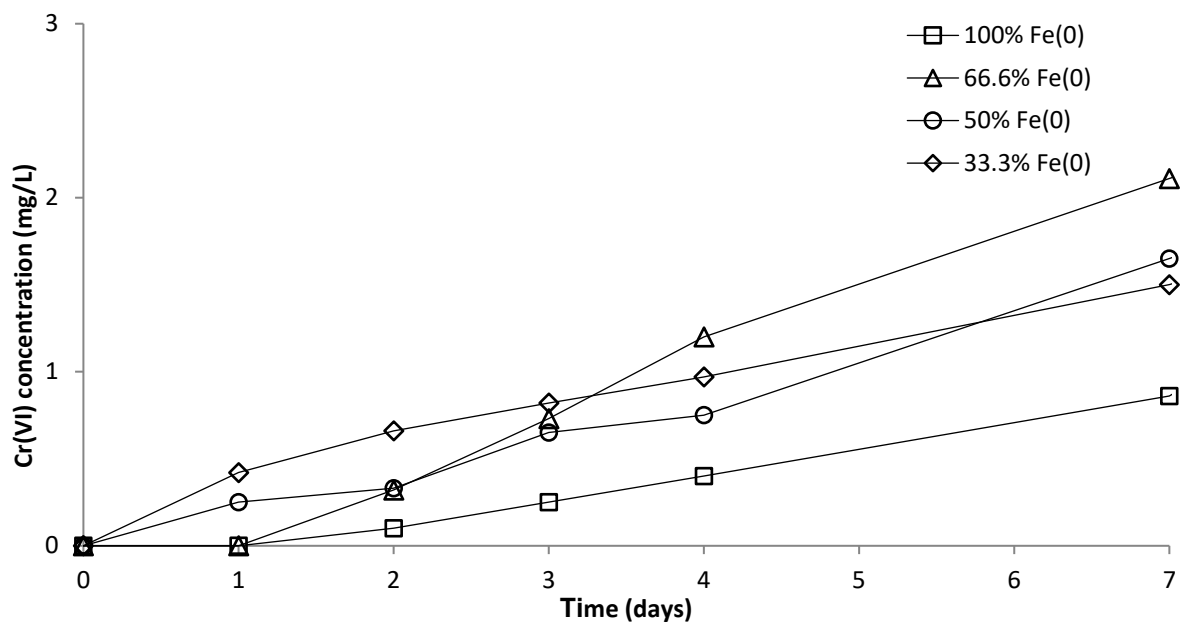

**Figure S15.** Evolution of  $\text{Cr}^{\text{VI}}$  breakthrough at pH 7.1, for columns having fixed  $\text{Fe}^0$  volume and variable total reactive zone volume  $V_2$ .

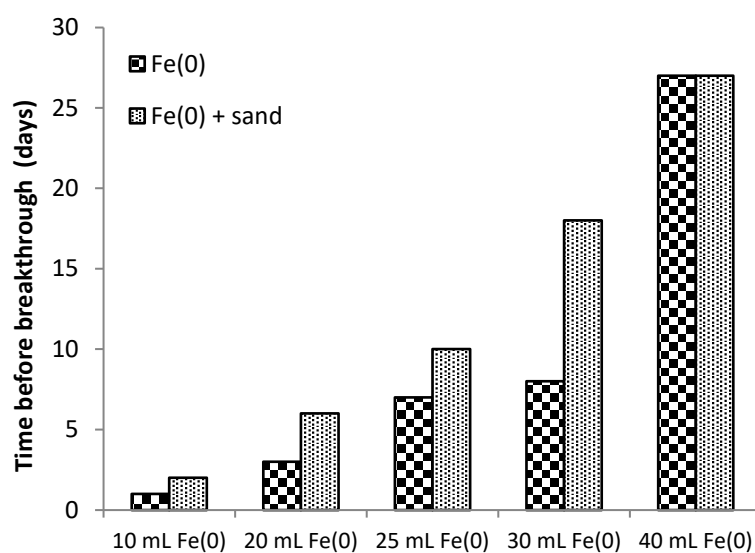

**Figure S16.** Evolution of  $\text{Cr}^{\text{VI}}$  breakthrough, for columns having variable  $\text{Fe}^0$  volume and fixed total reactive zone volume  $V_2$ .
